# Supplementary material
Source: HighWire-hosted journal article supplement (https://webarchive.library.unt.edu/content/suppl/2012/06/07/rspb.2012.0313)
Supplement: rspb20120313supp1.pdf [file rspb20120313supp1.pdf]

ESM:

Table 1.

Data table of oyster values (estuary-wide extent and biomass, mean density and mean oyster size) for all estuaries, past and present. Where both historic and present data were available and were determined to have been collected by comparable means comparative statistics are also provided. \* demarcates where data were proxied from the nearest estuary within the ecoregion, and therefore represent data with lower certainty. The reference used as a proxy is listed within the references for each estuary. Proxies were only used where expert opinion deemed the proxies reasonable. In estuaries with no remaining oyster grounds (oysters functionally extinct), densities are reported as "NA" as oysters were often present, but not in reef or bed formations. Biomass is therefore also listed as <1% in these cases.

| <b>Ecoregion</b>           | <b>NOAA Name</b>         | <b>State</b> | <b>Historic reef area (Ha)</b> | <b>Historic extent Year</b> | <b>Historic Mean Density (ind/m<sup>2</sup>)</b> | <b>Historic Mean Density Market (indm<sup>2</sup>)</b> | <b>Historic Mean Oyster length (mm)</b> | <b>Historic Mean oyster length Market (mm)</b> | <b>Current reef area (Ha)</b> | <b>Current extent year</b> | <b>Total Density (ind/m<sup>2</sup>)</b> | <b>Density Market (indm<sup>2</sup>)</b> | <b>Mean Oyster length (mm)</b> | <b>Mean oyster length Market (mm)</b> | <b>% Historic extent remaining</b> | <b>Historic biomass total (kg x 10<sup>3</sup>)</b> | <b>Present biomass total (kg x 10<sup>3</sup>)</b> | <b>% Historic biomass remaining</b> | <b>References</b> |
|----------------------------|--------------------------|--------------|--------------------------------|-----------------------------|--------------------------------------------------|--------------------------------------------------------|-----------------------------------------|------------------------------------------------|-------------------------------|----------------------------|------------------------------------------|------------------------------------------|--------------------------------|---------------------------------------|------------------------------------|-----------------------------------------------------|----------------------------------------------------|-------------------------------------|-------------------|
| Gulf of Maine/Bay of Fundy | Great Bay                | NH           | -                              | -                           | -                                                | -                                                      | -                                       | -                                              | 87                            | 2003-2009                  | 287                                      | -                                        | 55                             | -                                     | -                                  | -                                                   | 136                                                | -                                   | (1, 2)            |
| Virginian                  | Barnegat Bay             | NJ           | 5261                           | 1889                        | 18*                                              | 5*                                                     | 67*                                     | 82*                                            | 0                             | 0                          | NA                                       | NA                                       | -                              | -                                     | 0                                  | 880                                                 | 0                                                  | <1                                  | (3-6)             |
| Virginian                  | Bogue Sound              | NC           | 666                            | 1886-1887                   | 18*                                              | 5*                                                     | 67*                                     | 82*                                            | -                             | -                          | -                                        | -                                        | -                              | -                                     | -                                  | 73                                                  | -                                                  | -                                   | (4, 5, 7)         |
| Virginian                  | Delaware Bay             | NJ/DE        | 25149                          | 1889/1910                   | 18                                               | 5                                                      | 67*                                     | 82*                                            | 11471                         | 2009                       | 16                                       | 2                                        | 57                             | 87                                    | 46                                 | 4206                                                | 1179                                               | 28                                  | (3-5, 8)          |
| Virginian                  | Hudson River/Raritan Bay | NY/NJ        | 1660                           | 1886-1887                   | 18*                                              | 5*                                                     | 67*                                     | 82*                                            | 402                           | 1983/2010                  | 16*                                      | 2*                                       | 57*                            | 87*                                   | 24                                 | 278                                                 | 41                                                 | 15                                  | (4, 5, 8-11)      |
| Virginian                  | Ingram/ Fleets Bays      | VA           | -                              | -                           | -                                                | -                                                      | -                                       | -                                              | 83                            | 1980                       | 69                                       | -                                        | -                              | -                                     | -                                  | -                                                   | 17                                                 | -                                   | (12, 13)          |
| Virginian                  | James River              | VA           | 4467                           | 1910                        | 19                                               | 5                                                      | 67                                      | 82                                             | 2410                          | 1998-2006                  | -                                        | -                                        | -                              | -                                     | 54                                 | 535                                                 | 200                                                | 37                                  | (4, 14)           |
| Virginian                  | Long Island Sound        | NY/CT        | 13267                          | 1886-1887                   | 18*                                              | 5*                                                     | 67*                                     | 82*                                            | -                             | -                          | -                                        | -                                        | -                              | -                                     | -                                  | 2219                                                | -                                                  | -                                   | (3-5)             |
| Virginian                  | Lynnhaven River          | VA           | -                              | -                           | -                                                | -                                                      | -                                       | -                                              | 5                             | 2004-2006                  | -                                        | -                                        | -                              | -                                     | -                                  | -                                                   | 9                                                  | -                                   | (15)              |



| Ecoregion  | NOAA Name                    | State | Historic reef area (Ha) | Historic extent Year | Historic Mean Density (ind/m <sup>2</sup> ) | Historic Mean Density Market (indm <sup>2</sup> ) | Historic Mean Oyster length (mm) | Historic Mean oyster length Market (mm) | Current reef area (Ha) | Current extent year | Total Density (ind/m <sup>2</sup> ) | Density Market (indm <sup>2</sup> ) | Mean Oyster length (mm) | Mean oyster length Market (mm) | % Historic extent remaining | Historic biomass total (kg x 10 <sup>3</sup> ) | Present biomass total (kg x 10 <sup>3</sup> ) | % Historic biomass remaining | References |
|------------|------------------------------|-------|-------------------------|----------------------|---------------------------------------------|---------------------------------------------------|----------------------------------|-----------------------------------------|------------------------|---------------------|-------------------------------------|-------------------------------------|-------------------------|--------------------------------|-----------------------------|------------------------------------------------|-----------------------------------------------|------------------------------|------------|
| Carolinian | Broad River                  | SC    | 51                      | 1890                 | -                                           | -                                                 | -                                | -                                       | 622                    | 2006-2008           | 1229                                | 240                                 | 43                      | 75                             | -                           | -                                              | 968                                           | -                            | (24, 25)   |
| Carolinian | Charleston Harbor            | SC    | 27                      | 1890                 | -                                           | -                                                 | -                                | -                                       | 574                    | 2006-2008           | 1229                                | 240                                 | 43                      | 75                             | -                           | -                                              | 88                                            | -                            | (24, 25)   |
| Carolinian | New River                    | NC    | 126                     | 1886-1887            | -                                           | -                                                 | -                                | -                                       | -                      | -                   | -                                   | -                                   | -                       | -                              | -                           | -                                              | -                                             | -                            | (7)        |
| Carolinian | Ossabaw Sound                | GA    | 71                      | 1891                 | -                                           | -                                                 | -                                | -                                       | -                      | -                   | -                                   | -                                   | -                       | -                              | -                           | -                                              | -                                             | -                            | (23)       |
| Carolinian | Savannah River               | GA/SC | 62                      | 1890/1891            | -                                           | -                                                 | -                                | -                                       | -                      | -                   | -                                   | -                                   | -                       | -                              | -                           | -                                              | -                                             | -                            | (23, 25)   |
| Carolinian | St. Andrew/St. Simons Sounds | GA    | 185                     | 1891                 | -                                           | -                                                 | -                                | -                                       | -                      | -                   | -                                   | -                                   | -                       | -                              | -                           | -                                              | -                                             | -                            | (23)       |
| Carolinian | St. Catherines/Sapelo Sounds | GA    | 271                     | 1891                 | -                                           | -                                                 | -                                | -                                       | -                      | -                   | -                                   | -                                   | -                       | -                              | -                           | -                                              | -                                             | -                            | (23)       |
| Carolinian | St. Helena Sound             | SC    | 48                      | 1890                 | -                                           | -                                                 | -                                | -                                       | 401                    | 2006-2008           | 1229                                | 240                                 | 43                      | 75                             | -                           | -                                              | 625                                           | -                            | (24, 25)   |
| Carolinian | Stono/ North Edisto Rivers   | SC    | 115                     | 1890                 | -                                           | -                                                 | -                                | -                                       | 199                    | 2006-2008           | 1229                                | 240                                 | 43                      | 75                             | -                           | -                                              | 309                                           | -                            | (24, 25)   |
| Floridian  | Biscayne Bay                 | FL    | -                       | -                    | -                                           | -                                                 | -                                | -                                       | 0                      | 2005-2006           | NA                                  | NA                                  | -                       | -                              | -                           | -                                              | 0                                             | <1                           | (26)       |

| <b>Ecoregion</b>        | <b>NOAA Name</b>        | <b>State</b> | <b>Historic reef area (Ha)</b> | <b>Historic extent Year</b> | <b>Historic Mean Density (ind/m<sup>2</sup>)</b> | <b>Historic Mean Density Market (indm<sup>2</sup>)</b> | <b>Historic Mean Oyster length (mm)</b> | <b>Historic Mean oyster length Market (mm)</b> | <b>Current reef area (Ha)</b> | <b>Current extent year</b> | <b>Total Density (ind/m<sup>2</sup>)</b> | <b>Density Market (indm<sup>2</sup>)</b> | <b>Mean Oyster length (mm)</b> | <b>Mean oyster length Market (mm)</b> | <b>% Historic extent remaining</b> | <b>Historic biomass total (kg x 10<sup>3</sup>)</b> | <b>Present biomass total (kg x 10<sup>3</sup>)</b> | <b>% Historic biomass remaining</b> | <b>References</b> |
|-------------------------|-------------------------|--------------|--------------------------------|-----------------------------|--------------------------------------------------|--------------------------------------------------------|-----------------------------------------|------------------------------------------------|-------------------------------|----------------------------|------------------------------------------|------------------------------------------|--------------------------------|---------------------------------------|------------------------------------|-----------------------------------------------------|----------------------------------------------------|-------------------------------------|-------------------|
| Floridian               | Caloosahatchee River    | FL           | -                              | -                           | -                                                | -                                                      | -                                       | -                                              | 1                             | 2010                       | -                                        | -                                        | -                              | -                                     | -                                  | -                                                   | -                                                  | -                                   | (27)              |
| Floridian               | Charlotte Harbor        | FL           | -                              | -                           | -                                                | -                                                      | -                                       | -                                              | 97                            | 2010                       | -                                        | -                                        | -                              | -                                     | -                                  | -                                                   | -                                                  | -                                   | (27)              |
| Floridian               | Indian River            | FL           | -                              | -                           | -                                                | -                                                      | -                                       | -                                              | 90                            | 2007/<br>2010              | -                                        | -                                        | -                              | -                                     | -                                  | -                                                   | -                                                  | -                                   | (27, 28)          |
| Floridian               | N. Ten Thousand Islands | FL           | -                              | -                           | -                                                | -                                                      | -                                       | -                                              | 28                            | >2000                      | -                                        | -                                        | -                              | -                                     | -                                  | -                                                   | -                                                  | -                                   | (27)              |
| Floridian               | Rookery Bay             | FL           | -                              | -                           | -                                                | -                                                      | -                                       | -                                              | 10                            | >2000                      | -                                        | -                                        | -                              | -                                     | -                                  | -                                                   | -                                                  | -                                   | (27)              |
| Floridian               | Sarasota Bay            | FL           | -                              | -                           | -                                                | -                                                      | -                                       | -                                              | 23                            | 2010                       | 102‡*                                    | 3*                                       | 35*                            | 83*                                   | -                                  | -                                                   | 4                                                  | -                                   | (27, 28)          |
| Floridian               | Tampa Bay               | FL           | -                              | -                           | -                                                | -                                                      | -                                       | -                                              | 18                            | 2010                       | 102‡                                     | 3                                        | 35*                            | 83*                                   | -                                  | -                                                   | 3                                                  | -                                   | (27, 28)          |
| Northern Gulf of Mexico | Apalachee Bay           | FL           | -                              | -                           | -                                                | -                                                      | -                                       | -                                              | 1535                          | 2010                       | 158‡*                                    | 23*                                      | 51*                            | 90*                                   | -                                  | -                                                   | 1296                                               | -                                   | (27, 28)          |
| Northern Gulf of Mexico | Apalachicola Bay        | FL           | 2695                           | 1915                        | 15                                               | 5                                                      | 65                                      | 94                                             | 3491                          | 1990-<br>2010              | 158‡                                     | 23                                       | 51                             | 90                                    | 130                                | 465                                                 | 2947                                               | 634                                 | (28-30)           |
| Northern Gulf of Mexico | Aransas Bay             | TX           | 3885                           | 1891                        | 58*                                              | 30*                                                    | 81*                                     | 91*                                            | 482                           | 2007                       | 23                                       | 8                                        | 65                             | 93                                    | 12                                 | 4249                                                | 134                                                | 3                                   | (31-34)           |

| <b>Ecoregion</b>        | <b>NOAA Name</b>           | <b>State</b> | <b>Historic reef area (Ha)</b> | <b>Historic extent Year</b> | <b>Historic Mean Density (ind/m<sup>2</sup>)</b> | <b>Historic Mean Density Market (indm<sup>2</sup>)</b> | <b>Historic Mean Oyster length (mm)</b> | <b>Historic Mean oyster length Market (mm)</b> | <b>Current reef area (Ha)</b> | <b>Current extent year</b> | <b>Total Density (ind/m<sup>2</sup>)</b> | <b>Density Market (indm<sup>2</sup>)</b> | <b>Mean Oyster length (mm)</b> | <b>Mean oyster length Market (mm)</b> | <b>% Historic extent remaining</b> | <b>Historic biomass total (kg x 10<sup>3</sup>)</b> | <b>Present biomass total (kg x 10<sup>3</sup>)</b> | <b>% Historic biomass remaining</b> | <b>References</b> |
|-------------------------|----------------------------|--------------|--------------------------------|-----------------------------|--------------------------------------------------|--------------------------------------------------------|-----------------------------------------|------------------------------------------------|-------------------------------|----------------------------|------------------------------------------|------------------------------------------|--------------------------------|---------------------------------------|------------------------------------|-----------------------------------------------------|----------------------------------------------------|-------------------------------------|-------------------|
| Northern Gulf of Mexico | Atchafalaya/Vermilion Bays | LA           | 8050                           | 1905                        | 31                                               | 5                                                      | 71                                      | 105                                            | -                             | -                          | -                                        | -                                        | -                              | -                                     | -                                  | 3545                                                | -                                                  | -                                   | (35, 36)          |
| Northern Gulf of Mexico | Barataria Bay              | LA           | -                              | -                           | -                                                | -                                                      | -                                       | -                                              | 1028                          | 2010                       | 6                                        | 1                                        | 57                             | 93                                    | -                                  | -                                                   | 45                                                 | -                                   | (37)              |
| Northern Gulf of Mexico | Breton/Chandeleur Sounds   | LA           | 5427                           | 1898                        | 31*                                              | 5*                                                     | 69*                                     | 87*                                            | 4525                          | 2010                       | 6                                        | 0                                        | 51                             | 93                                    | 83                                 | 1697                                                | 119                                                | 7                                   | (35, 37, 38)      |
| Northern Gulf of Mexico | Calcasieu Lake             | LA           | -                              | -                           | -                                                | -                                                      | -                                       | -                                              | 1581                          | 2010                       | 18                                       | 7                                        | 57                             | 93                                    | -                                  | -                                                   | 357                                                | -                                   | (37)              |
| Northern Gulf of Mexico | Choctawhatchee Bay         | FL           | -                              | -                           | -                                                | -                                                      | -                                       | -                                              | 89                            | 2010                       | 68‡                                      | 16                                       | 57                             | 90                                    | -                                  | -                                                   | 45                                                 | -                                   | (27, 28)          |
| Northern Gulf of Mexico | Corpus Christi Bay         | TX           | 3367                           | 1891                        | 58*                                              | 30*                                                    | 81*                                     | 91*                                            | 290                           | 2007                       | 3                                        | 0                                        | 54                             | 98                                    | 9                                  | 3683                                                | 6                                                  | <1                                  | (31-34) ‡‡        |
| Northern Gulf of Mexico | Galveston Bay              | TX           | 12950                          | 1891                        | 58*                                              | 30*                                                    | 81*                                     | 91*                                            | 10795                         | 1995                       | 8                                        | 2                                        | 62                             | 99                                    | 83                                 | 14165                                               | 1027                                               | 7                                   | (31-33, 39) ††    |

| Ecoregion               | NOAA Name                                      | State | Historic reef area (Ha) | Historic extent Year | Historic Mean Density (ind/m <sup>2</sup> ) | Historic Mean Density Market (indm <sup>2</sup> ) | Historic Mean Oyster length (mm) | Historic Mean oyster length Market (mm) | Current reef area (Ha) | Current extent year | Total Density (ind/m <sup>2</sup> ) | Density Market (indm <sup>2</sup> ) | Mean Oyster length (mm) | Mean oyster length Market (mm) | % Historic extent remaining | Historic biomass total (kg x 10 <sup>3</sup> ) | Present biomass total (kg x 10 <sup>3</sup> ) | % Historic biomass remaining | References      |
|-------------------------|------------------------------------------------|-------|-------------------------|----------------------|---------------------------------------------|---------------------------------------------------|----------------------------------|-----------------------------------------|------------------------|---------------------|-------------------------------------|-------------------------------------|-------------------------|--------------------------------|-----------------------------|------------------------------------------------|-----------------------------------------------|------------------------------|-----------------|
| Northern Gulf of Mexico | Laguna Madre (Upper and Lower, and Baffin Bay) | TX    | 777                     | 1891                 | 58*                                         | 30*                                               | 81*                              | 91*                                     | 68                     | 2007                | 1                                   | 0                                   | 53                      | 85                             | 9                           | 850                                            | 0.5                                           | <1                           | (31-34) ††      |
| Northern Gulf of Mexico | Matagorda Bay                                  | TX    | 16679                   | 1907/1915            | 58                                          | 30                                                | 81                               | 91                                      | 2229                   | 2011                | 10                                  | 2                                   | 54                      | 94                             | 13                          | 18243                                          | 159                                           | 1                            | (31, 33, 40) †† |
| Northern Gulf of Mexico | Mobile Bay                                     | AL    | 1151                    | 1894                 | 29                                          | 14                                                | 75                               | 87                                      | 1045                   | 1968/1995           | 11                                  | 3                                   | 51*                     | 90*                            | 91                          | 498                                            | 98                                            | 20                           | (28, 41-43)     |
| Northern Gulf of Mexico | Pensacola Bay                                  | FL    | -                       | -                    | -                                           | -                                                 | -                                | -                                       | 3144                   | 2010                | 68‡                                 | 16                                  | 57                      | 90                             | -                           | -                                              | 1585                                          | -                            | (28)            |
| Northern Gulf of Mexico | Sabine Lake                                    | TX/LA | 259                     | 1891                 | 58*                                         | 30*                                               | 81*                              | 91*                                     | 480                    | 2010                | 41                                  | 14                                  | 69                      | 99                             | 185¶¶                       | 283                                            | 301                                           | 106                          | (31-33, 37) §§  |
| Northern Gulf of Mexico | San Antonio Bay                                | TX    | 2590                    | 1891                 | 58*                                         | 30*                                               | 81*                              | 91*                                     | 2158                   | ~2000               | 8                                   | 2                                   | 57                      | 98                             | 83                          | 2833                                           | 147                                           | 5                            | (31, 33, 34) †† |
| Northern Gulf of Mexico | St. Andrew Bay                                 | FL    | -                       | -                    | -                                           | -                                                 | -                                | -                                       | 890                    | 2010                | 230                                 | 19                                  | 44                      | 90                             | -                           | -                                              | 660                                           | -                            | (27, 28)        |

| Ecoregion                 | NOAA Name                 | State | Historic reef area (Ha) | Historic extent Year | Historic Mean Density (ind/m <sup>2</sup> ) | Historic Mean Density Market (indm <sup>2</sup> ) | Historic Mean Oyster length (mm) | Historic Mean oyster length Market (mm) | Current reef area (Ha) | Current extent year | Total Density (ind/m <sup>2</sup> ) | Density Market (indm <sup>2</sup> ) | Mean Oyster length (mm) | Mean oyster length Market (mm) | % Historic extent remaining | Historic biomass total (kg x 10 <sup>3</sup> ) | Present biomass total (kg x 10 <sup>3</sup> ) | % Historic biomass remaining | References       |
|---------------------------|---------------------------|-------|-------------------------|----------------------|---------------------------------------------|---------------------------------------------------|----------------------------------|-----------------------------------------|------------------------|---------------------|-------------------------------------|-------------------------------------|-------------------------|--------------------------------|-----------------------------|------------------------------------------------|-----------------------------------------------|------------------------------|------------------|
| Northern Gulf of Mexico   | Suwannee River            | FL    | -                       | -                    | -                                           | -                                                 | -                                | -                                       | 2138                   | 2010                | 68‡                                 | 16                                  | 57                      | 90                             | -                           | -                                              | 1078                                          | -                            | (27, 28)         |
| Northern Gulf of Mexico   | Terrebonne/Timbalier Bays | LA    | -                       | -                    | -                                           | -                                                 | -                                | -                                       | 1177                   | 2010                | 17                                  | 1                                   | 57                      | 93                             | -                           | -                                              | 80                                            | -                            | (37)             |
| Northern Gulf of Mexico   | West Mississippi Sound    | MS/LA | 3391                    | 1898/1911            | 31                                          | 5                                                 | 69                               | 87                                      | 6490                   | 2010/1973           | 2                                   | 0                                   | 57                      | 93                             | 191                         | 1061                                           | 84                                            | 8                            | (35, 37, 38)     |
| Southern California Bight | Newport Bay               | CA    | -                       | -                    | -                                           | -                                                 | -                                | -                                       | 0                      | 2011                | NA                                  | NA                                  | -                       | -                              | 0                           | -                                              | 0                                             | -                            | (44)             |
| Northern California       | Elkhorn Slough            | CA    | 2                       | 1929                 | 116*                                        | -                                                 | 35*                              | -                                       | 0                      | 2010                | NA                                  | NA                                  | -                       | -                              | 0                           | 0.5                                            | 0                                             | <1                           | (45-47)          |
| Northern California       | San Francisco Bay         | CA    | 3251                    | 1893                 | 116*                                        | -                                                 | 35*                              | -                                       | 0                      | 2006                | NA                                  | NA                                  | -                       | -                              | 0                           | 801                                            | 0                                             | <1                           | (46, 48, 49)     |
| O.W.V.C.                  | Humboldt Bay              | CA    | 137                     | 1935                 | 116*                                        | -                                                 | 35*                              | -                                       | 0                      | 2007                | NA                                  | NA                                  | -                       | -                              | 0                           | 34                                             | 0                                             | <1                           | (34, 46, 50)     |
| O.W.V.C.                  | Netarts Bay               | OR    | -                       | -                    | -                                           | -                                                 | -                                | -                                       | 4                      | 2011                | 33                                  | -                                   | 34                      | -                              | -                           | -                                              | 0.007                                         | -                            |                  |
| O.W.V.C.                  | Willapa Bay               | WA    | 6225†††                 | ~1850                | 116*                                        | -                                                 | 35*                              | -                                       | 0                      | 2011                | NA                                  | NA                                  | -                       | -                              | 0                           | 1533                                           | 0                                             | 0                            | (44, 46, 51, 52) |

| Ecoregion | NOAA Name   | State | Historic reef area (Ha) | Historic extent Year | Historic Mean Density (ind/m <sup>2</sup> ) | Historic Mean Density Market (indm <sup>2</sup> ) | Historic Mean Oyster length (mm) | Historic Mean oyster length Market (mm) | Current reef area (Ha) | Current extent year | Total Density (ind/m <sup>2</sup> ) | Density Market (indm <sup>2</sup> ) | Mean Oyster length (mm) | Mean oyster length Market (mm) | % Historic extent remaining | Historic biomass total (kg x 10 <sup>3</sup> ) | Present biomass total (kg x 10 <sup>3</sup> ) | % Historic biomass remaining | References |
|-----------|-------------|-------|-------------------------|----------------------|---------------------------------------------|---------------------------------------------------|----------------------------------|-----------------------------------------|------------------------|---------------------|-------------------------------------|-------------------------------------|-------------------------|--------------------------------|-----------------------------|------------------------------------------------|-----------------------------------------------|------------------------------|------------|
| O.W.V.C.  | Yaquina Bay | OR    | 27                      | 1895                 | 116                                         | -                                                 | 35                               | -                                       | -                      | -                   | -                                   | -                                   | -                       | -                              | -                           | 7                                              | -                                             | -                            | (46, 53)   |

† Baylor's survey of Virginia's oyster beds incorporated significant portions of unproductive grounds (4). Here we apply a correction factor of 47% of mapped area to be oyster grounds as determined by the US Army Corps of Engineers through comparing Baylor's survey with other more exclusive surveys of oyster grounds (54). Only tributaries deemed by expert judgement to be similar to James River and Tangier Sound (the locations of the alternative surveys) were handled in this way.

§ Biomass of oyster rocks estimated by Harding et al.(18), to which we added the biomass calculated to be standing on "shell and sand" and "shell and mud" as determined by Haven et al. (12).

¶ Extent was determined from aerial photography and therefore included vast areas of marsh which would not traditionally have been surveyed from river channels. We therefore included only reef areas that were within 5m of the historically surveyed channel edge. Nevertheless the historic and present extent are not directly comparable as it is unclear what definition of "oyster reef" was used historically (25).

‡ Densities are determined from the state fisheries managers' surveys of productive oyster reefs. As these productive oyster reefs represent an unknown portion of the oyster grounds mapped, we referred to a historic survey by of Matagorda bay (31), which sought to outline what proportion of oyster grounds bore oysters to determine that approximately 50% of the mapped grounds were barren. We therefore conservatively corrected the densities in these bays by a factor of 0.5 to bring the oyster density and extent measures to an appropriate scale to allow for comparison.

¶¶ Historic data represents the Texas portion of the bay only and our comparison is therefore highly conservative.

†† Shell size and density determined from Texas Parks and Wildlife dredge survey data for years 2000-2010

‡‡ Shell size and density determined from Texas Parks and Wildlife dredge survey data for years 1986-1991

§§ Shell size determined from Texas Parks and Wildlife dredge survey data for years 2006-2009

††† Historic areal extent of oyster reefs in Willapa bay was determined by digitizing historic maps by Collins (51) and Townsend (52), which illustrated both wild and cultivated beds at the time, followed by expert review of which areas marked as "cultivated" were likely to have been "natural" beds historically. This area therefore includes areas that were "cultivated" in the late 1800's.

References:

1. Grizzle RE & Brodeur M (2004) *Oyster (Crassostrea virginica) reef mapping in the Great Bay Estuary, New Hampshire - 2003*. (The New Hampshire Estuaries Project, Durham NH), p 19.

2. Grizzle RE & Ward K (2009) *Video-based mapping of oyster bottom in the Upper Piscataqua River, Sturgeon Creek, and Spruce Creek*. (University of New Hampshire, Durham NH), p 10.
3. Nelson J (1889) Oyster interests of New Jersey. *New Jersey Agricultural College Experiment Station Special Bulletin* E:1-40.
4. Moore HF (1910) Condition and extent of the oyster beds of James River, Virginia. (Department of Commerce and Labor, Washington D.C.), p 86.
5. Moore HF (1911) Condition and extent of the natural oyster beds of Delaware. *US Bureau of Fisheries Document* 745:1-29.
6. Mackenzie CL, Burrell VG, Rosenfield A, & Hobart WL (1997) The history, present condition and future of the molluscan fisheries of North and Central American and Europe. Volume 1, Atlantic and Gulf Coasts. *NOAA Technical Report NMFS* 127.
7. Winslow F (1889) Report on the sounds and estuaries of North Carolina with reference to oyster culture. *United States Coast and Geodetic Survey Bulletin* 10:53-132.
8. Powell EN, Bushek D, & Ashton-Alcox KA (2011) Report of the 13th stock assessment workshop for the New Jersey Delaware Bay oyster beds. (Haskin Shellfish Research Laboratory Rutgers University, Port Norris NJ), pp 179.
9. Blackford EG (1887) *Second report of the oyster investigation and of survey of oyster territory, for the years 1885 and 1886*. (Commissioner of Fisheries, Albany NY), pp 48.
10. Medley TL (2010) Wild oysters, *Crassostrea virginica*, in the Hudson River Estuary: growth, health and population structure. PhD Thesis (The City University of New York, New York), pp 133.
11. NJ Division of Fish and Wildlife (1983) *Public seed and market oyster bed maps*.
12. Haven DS, Whitcomb JP, & Kendall PC (1981) The present and potential productivity of the Baylor Grounds in Virginia. *Special report in applied marine science and ocean engineering No. 243* (Sea Grant Advisory Program, Virginia Institute of Marine Sciences, Gloucester Point. VA), pp 167.
13. Southworth M, Harding JM, Wesson JA, & Mann R (2010) Oyster (*Crassostrea virginica*, Gmelin 1791) population dynamics on public reefs in the Great Wicomico River, Virginia, USA. *J Shellfish Res* 29:271-290.
14. Mann R, Southworth MJ, Harding JM, & Wesson JA (2009) Population studies of the native oyster, *Crassostrea virginica*, (Gmelin, 1791) in the James River, Virginia, USA. *J Shellfish Res* 28:193-220.
15. Luckenbach MW & Ross PG (2009) *Recruitment, substrate quality and standing stock monitoring in support of NOAA-ACOE oyster restoration projects in the Great Wicomico, Rappahannock, Piankatank and Lynnhaven River basins*. (Virginia Institute of Marine Science, Wachapreague VA), pp 129.
16. Oviatt CA, et al. (2003) A century of fishing and fish fluctuations in Narragansett Bay. *Rev Fish Sci* 11:221-242.
17. Baylor JB (1895) Survey of oyster grounds in Virginia: Report of J.B. Baylor to the Governor of Virginia. (J.H. O'Bannon, Richmond VA), pp 14.
18. Harding JM, Mann R, Southworth MJ, & Wesson JA (2010) Management of the Piankatank River, Virginia, in support of oyster (*Crassostrea virginica*, Gmelin 1791) fishery repletion. *J Shellfish Res* 29:867-888.
19. Mitchell WJ, Grave C, & Green BK (1907) *First report of the shell fish commission of Maryland*. (Sun Job Printing Office, Baltimore, MD), pp 231.
20. Tarnowski ML (1997) in *Coastal Bays Shellfish Inventory. Final Report to Coastal Zone Management Division, MDNR, Contract No. 14-96-134-CZM010, Grant No. NA570Z0301*, eds Homer ML, Tarnowski ML, Bussell R, & Rice C (Annapolis MD), pp 140-160.
21. Winslow F (1881) Report on the oyster beds of the James River, Virginia, and of Tangier and Pocomoke Sounds, Maryland and Virginia. *Annual Report of the United States Coast and Geodetic Survey* Appendix 11:269-353.
22. Ross PG & Luckenbach MW (2009) *Population assessment of Eastern oysters (Crassostrea virginica) in the seaside coastal bays*. (Virginia Department of Environmental Quality, Richmond, VA), pp 111.
23. Drake JC (1891) On the sounds and estuaries of Georgia, with reference to oyster culture. *United States Coast and Geodetic Survey* 19: 179-209.
24. South Carolina Department of Natural Resources (2008) *South Carolina intertidal oyster reef mapping*. Online database, <http://www.dnr.sc.gov/GIS/descovoysterbed.html> Last accessed 25th July 2010.
25. Battle JD (1891) An investigation of the coast waters of South Carolina with reference to oyster-culture. *Bulletin of the United States Fish Commission* 10:303-330.
26. Gambordella M, McEachron L, Beals C, & Arnold WS (2007) *Establishing baselines for monitoring the response of oysters in southeast Florida to changes in freshwater input, Final Report*. (Florida FWCC Fish and Wildlife Research Institute, St. Petersburg FL), pp176.
27. Florida Wildlife Research Institute (2011) *Marine resources Geographic Information System Internet Map Server*. Online database, [http://ocean.floridamarine.org/mrgis/Description\\_Layers\\_Marine.htm#benthic](http://ocean.floridamarine.org/mrgis/Description_Layers_Marine.htm#benthic) Last accessed 3rd August 2011.
28. Arnold WS, Parker ML & Stephenson SP (2008) *Oyster monitoring in the northern estuaries. Final report to the South Florida Water Management District Grant Number: CP040614*. (Fish and Wildlife Research Institute, St. Petersburg FL). pp156.
29. Danglade E (1917) Condition and extent of the natural oyster beds and barren bottoms in the vicinity of Apalachicola, Florida. *Rep US Comm Fish* 841:3-68.
30. Swift F (1897) in *U.S. Commission of Fish and Fisheries, Report of Commissioner for 1896* ed Brice JJ (Government Printing Office, Washington DC), pp 187-221.
31. Moore HF (1907) Survey of oyster bottoms in Matagorda Bay. *US Bureau of Fisheries Document* 610:1-85.
32. Stevenson CH (1893) Report on the Coast Fisheries of Texas. *United States Commission of Fish and Fisheries* 17:373-420.
33. Texas Parks and Wildlife Department (2010) *Annual dredge survey of oyster grounds*.
34. NOAA Coastal Services Centre *Benthic Cover Data online database* <http://www.csc.noaa.gov/digitalcoast/data/benthiccover/index.html> Last accessed 3rd Dec 2010.
35. Moore HF (1913) *Condition and extent of the natural oyster beds and barren bottoms of Mississippi East of Biloxi* (Government Printing Office, Washington) pp 41.

36. Cary LR (1906) The conditions for oyster culture in the waters of the parishes of Vermillion and Iberia, Louisiana. *Bulletin Gulf Biologic Station* 4:1-27.
37. Louisiana Department of Wildlife and Fisheries (2010) *Oyster stock assessment report of the public oyster areas in Louisiana, seed grounds and seed reservations*. (Louisiana Department of Wildlife and Fisheries, Baton Rouge, LA), pp 92.
38. Moore HF (1899) Report on the oyster-beds of Louisiana. *United States Commission of Fish and Fisheries, Report of the Commissioner* 23:45-100.
39. Powell EN, Song J, Ellis MS, & Wilson-Ormond EA (1995) The status and long-term trends of oyster reefs in Galveston Bay, Texas. *J Shellfish Res* 14:439-457.
40. Moore HF & Danglede E (1915) Condition and extent of the natural oyster bed and barren bottoms of Lavaca Bay, Texas. *Rep US Comm Fish*, Doc. 809. pp 45.
41. Ritter HP (1895) Report on a reconnaissance of the oyster beds of Mobile Bay and Mississippi Sound, Alabama. *Bulletin of the United States Fisheries Commission* 15:325-340.
42. Moore HF (1913) The condition and extent of the natural oyster beds and barren bottoms of Mississippi Sound, Alabama. *Rep US Comm Fish* Doc 769, pp 62.
43. Alabama Marine Resources Division (2011) *Diver quadrat oyster survey summary, years 1990-2010*.
44. Polson MP & Zacherl DC (2009) Geographic distribution and intertidal population status for the Olympia oyster, *Ostrea lurida* Carpenter 1864, from Alaska to Baja. *J Shellfish Res* 28:69-77.
45. Hopkins AE (1937) Experimental observations on spawning, larval development, and setting in the Olympia oyster *Ostrea lurida*. *Bulletin of the Bureau of Fisheries* 48:438-503.
46. Dimick RE, Eglund G, & Long JB (1941) *Native oyster investigations of Yaquina bay, Oregon Progress Report II*. (Oregon Agricultural Experiment Station, Corvallis, OR), pp 176.
47. Galtsoff PS (1929) Oyster industry of the Pacific Coast of the United States. *Rep Comm Fish* 1066:367-400.
48. Bonnot P (1935) The California oyster industry. *California Fish and Game* 21:65-80.
49. Zabin CJ, Attoe S, Grosholz ED, & Coleman-Hulbert (2010) Shellfish conservation and restoration in San Francisco Bay: Opportunities and constraints. *Final Report for the Subtidal Habitat Goals Committee*. (University of California Davis, CA), pp 112.
50. Bonnot P (1936) Report of the oyster investigation at Humboldt Bay for 1935. *California Fish and Game* 22:284-294.
51. Collins JW (1888) Report on the fisheries of the Pacific coast of the United States. *Report of the Commissioner of Fish and Fisheries for 1882*, pp 3-270.
52. Townsend CH (1893) Report of observations respecting the oyster resources and oyster fishery of the Pacific Coast of the United States. *Rep US Comm Fish* 17:343-372.
53. Fasten N (1931) The Yaquina Oyster Beds of Oregon. *The American Naturalist* 65:434-468.
54. U.S. Army Corps of Engineers (2010) *Chesapeake Bay Native Oyster Restoration Master Plan (NORMP)*. (US Army Corps of Engineers, Baltimore and Norfolk Districts) pp 203.
